# Supplementary material for: Characterization of Cell Wall Proteins in Saccharomyces cerevisiae Clinical Isolates Elucidates Hsp150p in Virulence
Source: PubMed Central journal article supplement (PMC4535956; doi:10.1371/journal.pone.0135174), 2015-08-13
Supplement: pone.0135174.s002.pdf [file pone.0135174.s002.pdf]

## SUPPORTING INFORMATION.

S1 Table: List of peptides from cell wall proteins for SILAC quantification.

| Protein ID | Sequence   |                | [M+H] <sup>+</sup>      | Peptide Sequence <sup>b, c, d</sup>          |
|------------|------------|----------------|-------------------------|----------------------------------------------|
|            | Start      | End            |                         |                                              |
| Bgl2p      | 111        | 128            | 1940.05                 | IKESTVAGFLVGSEALYR                           |
| Crh1p      | <b>68</b>  | <b>73</b>      | <b>809.42</b>           | <b>WFTDLK</b>                                |
|            | <b>74</b>  | <b>79</b>      | <b>653.35</b>           | <b>HAGEIK</b>                                |
|            | <b>74</b>  | <b>91</b>      | <b>1877.94</b>          | <b>HAGEIKYGS DGLSMTLAK</b>                   |
|            | <b>80</b>  | <b>91</b>      | <b>1242.60</b>          | <b>YGS DGLSMTLAK</b>                         |
|            | <b>92</b>  | <b>99</b>      | <b>992.52</b>           | <b>RYDNPSLK</b>                              |
|            | <b>93</b>  | <b>99</b>      | <b>836.42</b>           | <b>YDNPSLK</b>                               |
|            | <b>100</b> | <b>108</b>     | <b>1122.53</b>          | <b>SNFYIMYGK</b>                             |
|            | <b>109</b> | <b>114</b>     | <b>714.48</b>           | <b>LEVILK</b>                                |
|            | 187        | 197            | 1326.63                 | TTWYLDGESVR                                  |
|            | 252        | 261            | 1082.57                 | VIVTDYSTGK                                   |
| <b>252</b> | <b>262</b> | <b>1210.67</b> | <b>VIVTDYSTGKK</b>      |                                              |
| 263        | 285        | 2498.07        | YTYGDQSGSWESIEADGGSIYGR |                                              |
| Crh2p      | <b>60</b>  | <b>74</b>      | 1827.79                 | <b>YFSHDSCMPVPICK</b>                        |
|            | <b>80</b>  | <b>96</b>      | <b>874.43</b>           | <b>FKDYSSK</b>                               |
|            | 124        | 134            | 1078.55                 | NSGGTVLSSTR                                  |
| Cwp1p      | <b>32</b>  | <b>49</b>      | <b>1946.93</b>          | <b>SGSDLQYLSVYSDNGTLK</b>                    |
|            | <b>50</b>  | <b>66</b>      | <b>1641.76</b>          | <b>LGSGSGSFEATITDDGK</b>                     |
|            | <b>50</b>  | <b>68</b>      | <b>1882.94</b>          | <b>LGSGSGSFEATITDDGK<b>L</b>K</b>            |
|            | <b>106</b> | <b>114</b>     | <b>959.48</b>           | <b>SSSGFYAIK</b>                             |
|            | <b>106</b> | <b>124</b>     | <b>2030.97</b>          | <b>SSSGFYAIKD GSSYIFSSK</b>                  |
|            | <b>115</b> | <b>124</b>     | <b>1090.51</b>          | <b>DGSSYIFSSK</b>                            |
|            | <b>125</b> | <b>139</b>     | <b>1545.79</b>          | <b>QSDDATGV<b>A</b>IRPTSK</b>                |
| Ccw12p     | 117        | 133            | 1476.91                 | ALPAAGALLAGAAALLL                            |
| Ccw14p     | <b>38</b>  | <b>60</b>      | <b>2676.10</b>          | <b>SSSTCD<b>S</b>LNQVTCY<b>C</b>EHENSAVK</b> |

|        |            |            |                |                                                                                                   |
|--------|------------|------------|----------------|---------------------------------------------------------------------------------------------------|
|        | <b>38</b>  | <b>61</b>  | <b>2804.19</b> | <b>SSST<u>C</u>DSL<u>N</u>QV<u>T</u>C<u>Y</u>CEHENS<u>A</u>V<u>K</u>K</b>                         |
|        | <b>61</b>  | <b>80</b>  | <b>2260.00</b> | <b>K<u>C</u>L<u>D</u>S<u>I</u>C<u>P</u>N<u>N</u>D<u>A</u>D<u>A</u>A<u>Y</u>S<u>A</u>F<u>K</u></b> |
|        | <b>62</b>  | <b>80</b>  | <b>2131.91</b> | <b><u>C</u>L<u>D</u>S<u>I</u>C<u>P</u>N<u>N</u>D<u>A</u>D<u>A</u>A<u>Y</u>S<u>A</u>F<u>K</u></b>  |
| Cwp2p  | 76         | 92         | 1458.78        | AAVGMGAGALAAAAMLL                                                                                 |
| Ecm33p | <b>162</b> | <b>172</b> | <b>1331.72</b> | <b>KVNVFNINNNR</b>                                                                                |
|        | <b>163</b> | <b>172</b> | <b>1203.62</b> | <b>VNVFNINNNR</b>                                                                                 |
|        | <b>248</b> | <b>262</b> | <b>1575.82</b> | <b>VGQSL<u>S</u>I<u>V</u>S<u>N</u>D<u>E</u>L<u>S</u>K</b>                                         |
|        | <b>285</b> | <b>291</b> | <b>792.43</b>  | <b>VIDGFNK</b>                                                                                    |
|        | <b>337</b> | <b>351</b> | <b>1623.78</b> | <b>LQSN<u>G</u>A<u>I</u>Q<u>G</u>D<u>S</u>F<u>V</u><u>C</u>K</b>                                  |
| Exg2p  | 208        | 218        | 1205.67        | ILYGD <u>L</u> GWLR                                                                               |
| Gas1p  | <b>83</b>  | <b>90</b>  | <b>957.58</b>  | <b>KLNTNVIR</b>                                                                                   |
|        | 106        | 127        | 2287.19        | ALNDADIYVIADLAAPATSINR                                                                            |
|        | <b>128</b> | <b>141</b> | <b>1700.78</b> | <b>DDPTWTV<u>D</u>L<u>F</u>N<u>S</u>Y<u>K</u></b>                                                 |
|        | <b>184</b> | <b>192</b> | <b>1186.59</b> | <b>QYISDKNYR</b>                                                                                  |
|        | <b>193</b> | <b>207</b> | <b>1695.78</b> | <b>KIPVGYSSN<u>D</u>D<u>E</u>D<u>T</u>R</b>                                                       |
|        | <b>193</b> | <b>209</b> | <b>1922.95</b> | <b>KIPVGYSSN<u>D</u>D<u>E</u>D<u>T</u>R<u>V</u>K</b>                                              |
|        | 194        | 207        | 1567.69        | IPVGYSSN <u>D</u> D <u>E</u> D <u>T</u> R                                                         |
|        | 210        | 222        | 1536.60        | MTDYFAC <u>G</u> DD <u>D</u> V <u>K</u>                                                           |
|        | <b>223</b> | <b>236</b> | <b>1753.74</b> | <b>ADFYGINMYEW<u>C</u>G<u>K</u></b>                                                               |
|        | 241        | 247        | 769.35         | TSGYADR                                                                                           |
|        | <b>415</b> | <b>424</b> | <b>1193.53</b> | <b>YGAYSF<u>C</u>TPK</b>                                                                          |
| Gas3p  | <b>32</b>  | <b>51</b>  | <b>2246.10</b> | <b>FIKPSSATNSESDNEVFFVK</b>                                                                       |
|        | 52         | 80         | 3046.29        | GVDYQPGGSSGYDADSDTDILSDPEV <u>C</u> AR                                                            |
|        | 81         | 94         | 1581.80        | DAYAFQQLGVNTVR                                                                                    |
|        | 134        | 147        | 1544.72        | ADPSGTYDSL <u>Y</u> LSR                                                                           |
|        | 203        | 217        | 1578.78        | SIPVGYSAADNTDLR                                                                                   |
|        | 223        | 242        | 2311.09        | YLQCNSLDGNKVND <u>D</u> L <u>D</u> ISK                                                            |
|        | <b>293</b> | <b>306</b> | <b>1514.74</b> | <b>TFDEVSEGLY<u>G</u>G<u>L</u>K</b>                                                               |
|        | <b>329</b> | <b>349</b> | <b>2387.16</b> | <b>LDDSGSLTYKDDFVNLES<u>Q</u>L<u>K</u></b>                                                        |
|        | <b>358</b> | <b>368</b> | <b>1257.59</b> | <b>ESEISSDSI<u>Y</u>K</b>                                                                         |
| Gas5p  | 34         | 45         | 1314.57        | GNAFFNSESGER                                                                                      |
|        | 192        | 206        | 1573.83        | QIPVGYSAADIVANR                                                                                   |
|        | 207        | 222        | 1829.78        | QLAAEYFN <u>C</u> GDEADAR                                                                         |
|        | <b>248</b> | <b>269</b> | <b>2652.28</b> | <b>MKLYQDYSVPVFLSEFG<u>C</u>N<u>Q</u>V<u>K</u></b>                                                |
|        | <b>250</b> | <b>269</b> | <b>2393.15</b> | <b>LYQDYSVPVFLSEFG<u>C</u>N<u>Q</u>V<u>K</u></b>                                                  |

|       |            |            |                |                                |
|-------|------------|------------|----------------|--------------------------------|
|       | <b>317</b> | <b>329</b> | <b>1600.79</b> | <b>LTDFENLKNEYSK</b>           |
| Mkc7p | 305        | 321        | 1988.06        | YAGDLYTIPIINTLQHR              |
| Pry3  | <b>121</b> | <b>130</b> | <b>1085.49</b> | <b>STAEIGCGYK</b>              |
| Plb2p | 101        | 111        | 1110.54        | IGIACSGGGYR                    |
| Pst1p | <b>126</b> | <b>140</b> | <b>1604.93</b> | <b>LITLPAISSFTSNIK</b>         |
|       | 246        | 262        | 1913.00        | LNTIGQTFSIVSNDYLK              |
|       | 319        | 326        | 762.36         | GGADVESK                       |
| Pir1p | <b>246</b> | <b>255</b> | <b>1079.54</b> | <b>SSGTLEMNLK</b>              |
|       | 246        | 263        | 1820.94        | SSGTLEMNLKGGILTDGK             |
|       | <b>246</b> | <b>265</b> | <b>2034.07</b> | <b>SSGTLEMNLKGGILTDGKGR</b>    |
| Pir2p | <b>318</b> | <b>327</b> | <b>1093.56</b> | <b>TSGTLEMNLK</b>              |
|       | 318        | 335        | 1834.96        | TSGTLEMNLKGGILTDGK             |
|       | <b>318</b> | <b>337</b> | <b>2048.08</b> | <b>TSGTLEMNLKGGILTDGKGR</b>    |
| Pir3p | 307        | 325        | 2271.05        | HIGSQCHEVYLQAIDLIDC            |
| Cis3p | <b>127</b> | <b>149</b> | <b>2452.22</b> | <b>DSSCKNSGTLELTLKDGVLTDAK</b> |
|       | 127        | 151        | 2665.35        | DSSCKNSGTLELTLKDGVLTDAKGR      |
|       | <b>132</b> | <b>141</b> | <b>1075.60</b> | <b>NSGTLELTLK</b>              |
|       | <b>132</b> | <b>149</b> | <b>1875.01</b> | <b>NSGTLELTLKDGVLTDAK</b>      |
|       | <b>132</b> | <b>151</b> | <b>2088.13</b> | <b>NSGTLELTLKDGVLTDAKGR</b>    |
|       | <b>142</b> | <b>149</b> | <b>818.43</b>  | <b>DGVLTDAK</b>                |
|       | <b>142</b> | <b>151</b> | <b>1031.55</b> | <b>DGVLTDAKGR</b>              |
| Ssa1p | 35         | 47         | 1471.71        | TTPSFVAFTDTER                  |
|       | 125        | 136        | 1327.66        | MKETAESYLGAK                   |
|       | 137        | 153        | 1897.93        | VNDAVVTVPAYFNDSQR              |
|       | 158        | 169        | 1199.67        | DAGTIAGLNVLRL                  |
|       | 170        | 186        | 1787.99        | IINEPTAAAIAAYGLDKK             |
|       | 218        | 233        | 1675.73        | ATAGDTHLGGEDFDNR               |
|       | 234        | 243        | 1274.69        | LVNHFIQEFK                     |
|       | 249        | 255        | 833.41         | DLSTNQR                        |
|       | 297        | 308        | 1526.74        | ARFEELCADLFR                   |
|       | 326        | 339        | 1459.78        | SQVDEIVLVGGSTR                 |
|       | 507        | 514        | 961.52         | LSKEDIEK                       |
| Scw4p | <b>135</b> | <b>148</b> | <b>1533.69</b> | <b>GITYTPYESSGACK</b>          |
|       | 149        | 167        | 2019.04        | SASEVASDLAQLTDFPVIR            |
|       | <b>168</b> | <b>181</b> | <b>1686.78</b> | <b>LYGTDCNQVENVFK</b>          |

|        |            |            |                |                                            |
|--------|------------|------------|----------------|--------------------------------------------|
|        | 189        | 207        | 2185.15        | VFLGIYYVDQIQDGVNTIK                        |
|        | 292        | 308        | 1986.04        | NTVAQDSGKWLLEQIQR                          |
|        | 301        | 308        | 1085.61        | WLLEQIQR                                   |
|        | 309        | 317        | 1064.52        | VWTAC <u>CD</u> GKK                        |
|        | 370        | 378        | 909.43         | ADGAYGVEK                                  |
|        | <b>370</b> | <b>386</b> | <b>1871.88</b> | <b>ADGAYGVEKYWGILSNE</b>                   |
|        | 379        | 386        | 981.47         | YWGILSNE                                   |
| Scw10p | <b>138</b> | <b>151</b> | <b>1576.66</b> | <b>GITYSPYND<u>D</u>G<u>S</u>C<u>K</u></b> |
|        | 152        | 170        | 2065.02        | STAQVASDLEQLTGFDNIR                        |
|        | <b>171</b> | <b>186</b> | <b>1822.90</b> | <b>LYGVDC<u>S</u>QVENVLQAK</b>             |
|        | 321        | 343        | 2436.19        | DVVITETGWPSKGDTYGEAVPSK                    |
|        | <b>344</b> | <b>354</b> | <b>1131.60</b> | <b>ANQEAAISSIK</b>                         |
|        | <b>355</b> | <b>372</b> | <b>2053.93</b> | <b>SS<u>C</u>GSSAYLFTAFNDLW<u>K</u></b>    |
| Tdh3p  | 47         | 53         | 835.37         | YDSTHGR                                    |
|        | 54         | 70         | 1882.93        | YAGEVSHDDKHIIVDGK                          |
|        | 117        | 137        | 2207.11        | VVITAPSSTAPMFVMGVNEEK                      |
|        | 117        | 143        | 2914.46        | VVITAPSSTAPMFVMGVNEEKYTSDLK                |
|        | 144        | 160        | 1705.86        | IVSNASCTTNCLAPLAK                          |
|        | 161        | 184        | 2575.31        | VINDAFGIEEGLMTTVHSLTATQK                   |
|        | 185        | 195        | 1297.63        | TVDGPSHKDWR                                |
|        | 199        | 213        | 1374.72        | TASGNIIPSSTGAAK                            |
|        | 232        | 246        | 1470.84        | VPTVDVSVVDLTVK                             |
|        | 247        | 258        | 1481.78        | LNKETTYDEIKK                               |
|        | 308        | 321        | 1752.79        | LVSWDNEYGYSTR                              |
|        | 322        | 332        | 1179.67        | VVDLVEHVAKA                                |
| Tos1p  | <b>355</b> | <b>367</b> | <b>1575.66</b> | <b>TLQYGDAS<u>C</u><u>S</u>C<u>W</u>K</b>  |
|        | <b>368</b> | <b>385</b> | <b>1943.87</b> | <b>TG<u>C</u>GEMDLFEILTAGSDK</b>           |
|        | <b>412</b> | <b>421</b> | <b>1051.54</b> | <b>AAVIFNSSDK</b>                          |

Note:

- Mass for singly charged peptide with Lys-D0 labeling.
- Peptides were from trypsin digestion with up to three Lys or Arg miss-cleavage.
- The underlined cysteines were carbamidomethyl modified with a 57.02 Da increase in mass.
- Peptide sequences in bold were used for SILAC quantification.
