# Supplementary material for: Characterization of Cell Wall Proteins in Saccharomyces cerevisiae Clinical Isolates Elucidates Hsp150p in Virulence
Source: PubMed Central journal article supplement (PMC4535956; doi:10.1371/journal.pone.0135174), 2015-08-13
Supplement: pone.0135174.s003.pdf [file pone.0135174.s003.pdf]

S2 Table: List of peptides from cytoplasmic proteins as the internal control for SILAC

quantification.

| Protein ID | sequence   |            | [M+H] <sup>+</sup> | Peptide sequence <sup>b, c, d</sup>   |
|------------|------------|------------|--------------------|---------------------------------------|
|            | start      | end        |                    |                                       |
| EF-1a      | <b>6</b>   | <b>20</b>  | <b>1560.85</b>     | <b>SHINVVVIGHVDSGK</b>                |
|            | 31         | 37         | 805.40             | <u>C</u> GGIDKR                       |
|            | <b>38</b>  | <b>44</b>  | <b>894.49</b>      | <b>TIEKF EK</b>                       |
|            | <b>56</b>  | <b>62</b>  | <b>894.47</b>      | <b>YAWVLDK</b>                        |
|            | <b>56</b>  | <b>64</b>  | <b>1135.65</b>     | <b>YAWVLDK LK</b>                     |
|            | 56         | 67         | 1491.83            | YAWVLDK LKAER                         |
|            | 85         | 96         | 1355.71            | YQVTVIDAPGHR                          |
|            | 85         | 100        | 1858.98            | YQVTVIDAPGHRDFIK                      |
|            | 101        | 129        | 2923.45            | NMITGTSQAD <u>C</u> AILIAGGVGEFEAGISK |
|            | 135        | 146        | 1326.75            | EHALLAFTLGVR                          |
|            | <b>147</b> | <b>154</b> | <b>884.56</b>      | <b>QLIVAVNK</b>                       |
|            | 160        | 170        | 1436.72            | WDESRFQEIVK                           |
|            | 165        | 170        | 763.44             | FQEIVK                                |
|            | <b>165</b> | <b>177</b> | <b>1582.85</b>     | <b>FQEIVKETS NFIK</b>                 |
|            | 165        | 178        | 1710.94            | FQEIVKETS NFIKK                       |
|            | 171        | 177        | 838.43             | ETS NFIK                              |
|            | 185        | 210        | 2908.40            | TVPFVPISGWNGDNMIEATTNAPWYK            |
|            | 211        | 217        | 877.44             | GWEKETK                               |
|            | 218        | 224        | 658.43             | AGVVKGK                               |
|            | 223        | 245        | 2548.41            | GKTLLEAIDAIEQPSRPTDKPLR               |
|            | 225        | 245        | 2363.29            | TLLEAIDAIEQPSRPTDKPLR                 |
|            | <b>246</b> | <b>253</b> | <b>975.55</b>      | <b>LPLQDVYK</b>                       |
|            | 254        | 264        | 1025.61            | IGGIGTVPVGR                           |
|            | <b>265</b> | <b>288</b> | <b>2430.33</b>     | <b>VETGVIKPGMVVTFAPAGVTTEVK</b>       |
|            | <b>289</b> | <b>311</b> | <b>2550.20</b>     | <b>SVEMHHEQLEQGVPGDNVGFNVK</b>        |
|            | 320        | 328        | 976.46             | RGNV <u>C</u> GDAK                    |
|            | 320        | 333        | 1527.73            | RGNV <u>C</u> GDAKNDPPK               |
|            | <b>321</b> | <b>328</b> | <b>820.36</b>      | <b>GNV<u>C</u>GDAK</b>                |
|            | <b>370</b> | <b>376</b> | <b>893.46</b>      | <b>FDELLEK</b>                        |

|       |            |            |                |                                        |
|-------|------------|------------|----------------|----------------------------------------|
|       | 370        | 379        | 1278.63        | FDELLEKNDR                             |
|       | 370        | 380        | 1434.73        | FDELLEKNDRR                            |
|       | 384        | 390        | 866.47         | KLEDHPK                                |
|       | <b>394</b> | <b>401</b> | <b>760.42</b>  | <b>SGDAALVK</b>                        |
|       | <b>402</b> | <b>421</b> | <b>2311.13</b> | <b>FVPSKPMCVAFSEYPPLGR</b>             |
|       | <b>429</b> | <b>437</b> | <b>914.57</b>  | <b>QTVAVGVK</b>                        |
| Pdc1p | <b>37</b>  | <b>44</b>  | <b>996.48</b>  | <b>IYEVEGMR</b>                        |
|       | <b>128</b> | <b>151</b> | <b>2522.21</b> | <b>MSANISETTAMITDIATAPAEIDR</b>        |
|       | <b>180</b> | <b>209</b> | <b>3323.80</b> | <b>LLQTPIDMSLKPNDASEKEVIDTILALVK</b>   |
|       | <b>213</b> | <b>224</b> | <b>1375.65</b> | <b>NPVILADACCSR</b>                    |
|       | <b>210</b> | <b>224</b> | <b>1689.81</b> | <b>DAKNPVILADACCSR</b>                 |
|       | <b>234</b> | <b>249</b> | <b>1777.96</b> | <b>LIDLTQFPAFVTPMGK</b>                |
|       | <b>233</b> | <b>249</b> | <b>1906.05</b> | <b>KLIDLTQFPAFVTPMGK</b>               |
|       | <b>259</b> | <b>273</b> | <b>1596.86</b> | <b>YGGVYVGTLSKPEVK</b>                 |
|       | <b>305</b> | <b>315</b> | <b>1356.64</b> | <b>NIVEFHSDHMK</b>                     |
|       | <b>333</b> | <b>342</b> | <b>1016.60</b> | <b>LLTTIADAAK</b>                      |
|       | <b>343</b> | <b>352</b> | <b>1057.62</b> | <b>GYKPVAVPAR</b>                      |
|       | <b>479</b> | <b>484</b> | <b>664.41</b>  | <b>LIHGPK</b>                          |
|       | <b>485</b> | <b>505</b> | <b>2388.20</b> | <b>AQYNEIQGWDHLSLLPTFGAK</b>           |
|       | <b>512</b> | <b>520</b> | <b>1006.48</b> | <b>VATTGEWDK</b>                       |
|       | <b>512</b> | <b>525</b> | <b>1591.80</b> | <b>VATTGEWDKLTQDK</b>                  |
|       | <b>535</b> | <b>554</b> | <b>2286.19</b> | <b>MIEIMLPVFDAPQNLVEQAK</b>            |
| Pma1p | <b>100</b> | <b>109</b> | <b>1168.53</b> | <b>YGLNQMADEK</b>                      |
|       | <b>100</b> | <b>115</b> | <b>1823.92</b> | <b>YGLNQMADEKESLVVK</b>                |
|       | <b>175</b> | <b>184</b> | <b>1057.64</b> | <b>TLANTAVVIR</b>                      |
|       | <b>185</b> | <b>215</b> | <b>3259.67</b> | <b>DGQLVEIPANEVVPGDILQLEDGTVIPTDGR</b> |
|       | <b>216</b> | <b>239</b> | <b>2652.31</b> | <b>IVTEDCFLQIDQSAITGESLAVDK</b>        |
|       | <b>240</b> | <b>252</b> | <b>1456.67</b> | <b>HYGDQTFSSSTVK</b>                   |
|       | <b>240</b> | <b>253</b> | <b>1612.77</b> | <b>HYGDQTFSSSTVKR</b>                  |
|       | <b>253</b> | <b>271</b> | <b>2013.98</b> | <b>RGEGFMVVTATGDNTFVGR</b>             |
|       | <b>254</b> | <b>271</b> | <b>1857.88</b> | <b>GEGFMVVTATGDNTFVGR</b>              |
|       | <b>272</b> | <b>278</b> | <b>686.42</b>  | <b>AAALVNK</b>                         |
|       | <b>429</b> | <b>435</b> | <b>863.50</b>  | <b>SLKQYPK</b>                         |
|       | <b>520</b> | <b>548</b> | <b>3254.47</b> | <b>GEGHWEILGVMPKMDPPRDDTAQTVSEAR</b>   |
|       | <b>538</b> | <b>548</b> | <b>1192.54</b> | <b>DDTAQTVSEAR</b>                     |

|            |            |                |                      |
|------------|------------|----------------|----------------------|
| <b>554</b> | <b>566</b> | <b>1302.75</b> | <b>VKMLTGDAVGIAK</b> |
| <b>910</b> | <b>918</b> | <b>1058.51</b> | <b>VSTQHEKET</b>     |

---

Note:

- Mass for singly charged peptide with Lys-D0 labeling.
- Peptides were from trypsin digestion with up to three Lys or Arg miss-cleavage.
- The underlined cysteines were carbamidomethyl modified with a 57.02 Da increase in mass.
- Peptide sequences in bold were used for SILAC quantification.
