# Supplementary material for: Characterization of Cell Wall Proteins in Saccharomyces cerevisiae Clinical Isolates Elucidates Hsp150p in Virulence
Source: PubMed Central journal article supplement (PMC4535956; doi:10.1371/journal.pone.0135174), 2015-08-13
Supplement: pone.0135174.s004.pdf [file pone.0135174.s004.pdf]

S3 Table: The averaged relative quantitative levels of cell wall proteins analyzed by MassMatrix (MM) and MaxQuant (MQ).

| Cell Wall Protein | YYC1              |            | YYC2               |            | YYC3       |            | YYC38             |            |
|-------------------|-------------------|------------|--------------------|------------|------------|------------|-------------------|------------|
|                   | MM                | MQ         | MM                 | MQ         | MM         | MQ         | MM                | MQ         |
| <b>GPI-CWP</b>    |                   |            |                    |            |            |            |                   |            |
| Ccw14p/Ssr1p      | 1.33±0.04         | 1.28±0.39  | 2.84±0.40          | 1.58±0.61  | 1.05±0.01  | 0.86±0.18  | 1.09±0.07         | 1.01±0.05  |
| Crh1p             | 2.38±0.34*        | 2.17±0.61* | 6.89±1.20*         | 4.80±2.44* | 2.40±0.28* | 1.88±0.25* | 2.02±0.31*        | 2.16±0.52* |
| Crh2p/Utr2p       | 2.80 <sup>#</sup> | 3.09±1.40* | 4.07±0.81          | 2.35±1.17  | 1.42±0.18  | 1.23±0.38  | 2.02±0.65         | 2.17±0.39* |
| Cwp1p             | 1.86±0.46*        | 1.65±0.65  | 2.17±0.55*         | 1.28±0.77  | 1.37±0.25  | 1.01±0.24  | 1.56±0.41         | 1.05±0.07  |
| Ecm33p            | 2.38±0.30*        | 1.85±0.52* | 2.94±0.64*         | --         | 2.23±0.22* | --         | 1.42±0.34         | 1.25±0.25  |
| Gas1p             | 1.52±0.30         | 1.36±0.39  | 2.41±0.45*         | 1.49±0.62  | 1.16±0.13  | 0.91±0.07  | 1.21±0.20         | 1.16±0.16  |
| Gas3p             | 0.35±0.21*        | 0.43±0.23* | 1.01±0.17          | 0.74±0.37  | 0.56±0.06  | 0.68±0.18* | 0.66±0.15         | 0.70±0.19* |
| Gas5p             | 1.13±0.50         | 1.06±0.38  | 1.76±0.25          | 1.01±0.52  | 0.51±0.15* | 0.76±0.13  | 0.71±0.30         | 0.68±0.22  |
| Pst1p             | 10.19±1.85        | 8.02±0.59  | 15.88 <sup>#</sup> | 5.39±1.32  | 1.97±0.18  | 3.82±0.73  | 3.20 <sup>#</sup> | 3.71±0.18  |
| <b>ASL-CWP</b>    |                   |            |                    |            |            |            |                   |            |
| Cis3p/Pir4p       | 3.37±0.41*        | 3.40±0.82* | 3.55±0.53*         | 2.17±1.10  | 2.71±0.63* | 2.44±0.45* | 2.15±0.62*        | 2.34±0.44* |
| Hsp150p/Pir2p     | 2.66±0.60*        | 3.21±1.39* | 7.59±1.14*         | 4.90±2.24* | 2.46±0.72* | 2.22±0.26* | 2.75±0.67*        | 3.05±0.56* |
| Pir1p             | 2.45±0.39*        | 2.80±0.82* | 5.09±2.28*         | 2.42±1.12* | 1.96±1.01  | 1.26±0.31  | 2.24±0.36*        | 2.21±0.51* |
| Scw4p             | 2.48±0.26*        | 2.13±0.65* | 3.15±0.24*         | 1.83±0.81  | 0.90±0.84  | 1.39±0.18* | 1.82±0.17*        | 1.81±0.29* |
| Scw10p            | 3.97±0.99         | 4.43±0.77* | 10.60±2.26         | 6.56±2.82* | 5.85±0.98  | 4.97±0.78* | 5.39±2.06         | 4.53±0.85* |
| Tos1p             | 1.91±0.35         | 1.57±0.36* | 3.06±0.37*         | 1.76±0.98  | 1.29±0.13  | 1.04±0.18  | 1.50±0.01         | 1.37±0.24* |

\*Asterisks indicate statistically significant differences from S288c.

<sup>#</sup> No SD data available due to the single detection in 5 biological replicates.
